# Supplementary material
Source: PubMed Central journal article supplement (PMC7163776)
Supplement: jamaoncol-6-1-s001.pdf [file jamaoncol-6-1-s001.pdf]

## Supplementary Online Content

Di Maio M, Audisio M, Cardone C, et al. The use of not-negative conclusions to describe results of formally negative trials presented at oncology meetings. *JAMA Oncol*. Published online April 16, 2020. doi:10.1001/jamaoncol.2020.0475

**eTable.** Oral presentations of formally negative trials at ASCO or ESMO meetings between 2017 and 2019, with not-negative authors' conclusions.

This supplementary material has been provided by the authors to give readers additional information about their work.

**eTable. Oral presentations of formally negative trials at ASCO or ESMO meetings between 2017 and 2019, with not-negative authors' conclusions.**

| Meeting   | Abstract code | First author | Disease and setting                                   | Number of patients | Experimental treatment                                  | Standard treatment                        | Authors' conclusions                                                                                                                                     | Statement in Conclusions that primary endpoint was not met | Reason of not-negative authors' conclusions                                |                               |                                 |                                                                     | Notes                            |
|-----------|---------------|--------------|-------------------------------------------------------|--------------------|---------------------------------------------------------|-------------------------------------------|----------------------------------------------------------------------------------------------------------------------------------------------------------|------------------------------------------------------------|----------------------------------------------------------------------------|-------------------------------|---------------------------------|---------------------------------------------------------------------|----------------------------------|
|           |               |              |                                                       |                    |                                                         |                                           |                                                                                                                                                          |                                                            | Numerically better outcome in experimental arm but not significant P value | Emphasis on subgroup analysis | Emphasis on secondary endpoints | Interpretation as "non inferiority" of a superiority negative trial |                                  |
| ASCO 2017 | 4006          | Primrose     | Biliary tract cancer; adjuvant treatment              | 447                | Capecitabine                                            | No adjuvant treatment                     | Capecitabine as adjuvant improves OS and should become standard of care in this setting                                                                  | No                                                         | Yes                                                                        |                               | Yes                             |                                                                     | Emphasis on sensitivity analysis |
| ASCO 2017 | 2000          | Terasaki     | Glioblastoma; patients refractory to temozolomide     | 88                 | Personalized peptide vaccination + best supportive care | Placebo + best supportive care            | Personalized peptide vaccination was clinically beneficial for 60% of patients, by means of median OS and 1-year survival rate                           | No                                                         |                                                                            | Yes                           |                                 |                                                                     |                                  |
| ASCO 2017 | 11000         | Chawla       | Soft tissue sarcoma; relapse after prior chemotherapy | 433                | Aldoxorubicin                                           | Investigators' choice                     | Aldoxorubicin significantly prolonged PFS in North American and leiomyoliposarcoma subjects. Aldoxorubicin is a good alternative vs. standard therapies. | No                                                         | Yes                                                                        | Yes                           |                                 | Yes                                                                 |                                  |
| ASCO 2017 | 5008          | Nabid        | High-risk prostate cancer; adjuvant treatment         | 630                | Androgen deprivation treatment, 36 months               | Androgen deprivation treatment, 18 months | Therapy duration can be safely reduced from 36 to 18 months, that represents a new standard of care                                                      | No                                                         |                                                                            |                               |                                 | Yes                                                                 |                                  |
| ASCO 2017 | 5503          | Nomura       | High risk endometrial cancer; adjuvant treatment      | 788                | Docetaxel plus cisplatin or paclitaxel plus cisplatin   | Doxorubicin plus cisplatin                | Since each regimen showed adequate tolerability, taxane plus platinum agent regimens may be a reasonable alternative to doxorubicin + cisplatin          | Yes                                                        |                                                                            |                               |                                 | Yes                                                                 |                                  |
| ASCO 2017 | 5502          | de Boer      | High risk endometrial cancer; adjuvant treatment      | 686                | Chemo-radiotherapy                                      | Radiotherapy alone                        | Significant 11% FFS benefit with chemo-radiotherapy. Combined chemo-radiotherapy recommended to maximize FFS.                                            | No                                                         | Yes                                                                        | Yes                           |                                 |                                                                     |                                  |

| Meeting   | Abstract code | First author  | Disease and setting                                                                   | Number of patients | Experimental treatment                                                  | Standard treatment                         | Authors' conclusions                                                                                                                             | Statement in Conclusions that primary endpoint was not met | Reason of not-negative authors' conclusions                                |                               |                                 |                                                                     | Notes                                                        |
|-----------|---------------|---------------|---------------------------------------------------------------------------------------|--------------------|-------------------------------------------------------------------------|--------------------------------------------|--------------------------------------------------------------------------------------------------------------------------------------------------|------------------------------------------------------------|----------------------------------------------------------------------------|-------------------------------|---------------------------------|---------------------------------------------------------------------|--------------------------------------------------------------|
|           |               |               |                                                                                       |                    |                                                                         |                                            |                                                                                                                                                  |                                                            | Numerically better outcome in experimental arm but not significant P value | Emphasis on subgroup analysis | Emphasis on secondary endpoints | Interpretation as "non inferiority" of a superiority negative trial |                                                              |
| ESMO 2017 | LBA45_PR      | Cohen         | Recurrent/metastatic head & neck squamous cell cancer, after platinum                 | 495                | Pembrolizumab                                                           | Methotrexate or docetaxel or cetuximab     | Pembrolizumab provided a 19% reduction in the risk of death over investigator's choice of SOC in patients with R/M HNSCC                         | Yes                                                        | Yes                                                                        | Yes                           | Yes                             |                                                                     | Emphasis on confounding effect of post-study crossover on OS |
| ESMO 2017 | LBA55         | Casali        | GIST; adjuvant treatment                                                              | 908                | Imatinib, 2 years                                                       | No treatment                               | In the high-risk subgroup, trends at 10 years (...) were seen for imatinib-free survival, OS and RFS in favour of imatinib                       | No                                                         |                                                                            | Yes                           |                                 |                                                                     |                                                              |
| ASCO 2018 | LBA 4002      | Van Thienoven | Resectable and borderline resectable pancreatic adenocarcinoma; neoadjuvant treatment | 246                | Preoperative radio-chemotherapy plus surgery plus adjuvant chemotherapy | Surgery plus adjuvant chemotherapy         | These results suggest a benefit of neoadjuvant chemotherapy over upfront surgery                                                                 | No                                                         | Yes                                                                        | Yes                           | Yes                             |                                                                     |                                                              |
| ESMO 2018 | 1378O         | Kowalski      | Advanced NSCLC; after failure of 2 or more lines                                      | 292                | Durvalumab                                                              | Erlotinib, gemcitabine or vinorelbine      | PD-L1 ≥25%: clinically meaningful improvement in OS.<br><br>PD-L1 <25%: non-significant numerical improvement in OS                              | No                                                         | Yes                                                                        |                               |                                 |                                                                     |                                                              |
| ESMO 2018 | LBA5          | Parker        | Newly diagnosed metastatic prostate cancer                                            | 2061               | Prostate radiotherapy + androgen deprivation therapy +/- docetaxel      | Androgen deprivation therapy +/- docetaxel | Prostate radiotherapy should be a standard treatment option for men with newly diagnosed metastatic prostate cancer with a low metastatic burden | No                                                         |                                                                            | Yes                           |                                 |                                                                     |                                                              |
| ASCO 2019 | 11001         | Bonvalot      | Retroperitoneal sarcoma; neoadjuvant treatment                                        | 266                | Preoperative radiotherapy plus surgery                                  | Surgery alone                              | Abdominal RFS was similar in the two groups. Abdominal RFS was significantly better after radiotherapy in the liposarcoma subgroup.              | No                                                         |                                                                            | Yes                           |                                 |                                                                     |                                                              |

| Meeting   | Abstract code | First author | Disease and setting                                                                        | Number of patients | Experimental treatment                                      | Standard treatment                       | Authors' conclusions                                                                                                                                                                      | Statement in Conclusions that primary endpoint was not met                                    | Reason of not-negative authors' conclusions                                |                               |                                 |                                                                     | Notes                                                                             |
|-----------|---------------|--------------|--------------------------------------------------------------------------------------------|--------------------|-------------------------------------------------------------|------------------------------------------|-------------------------------------------------------------------------------------------------------------------------------------------------------------------------------------------|-----------------------------------------------------------------------------------------------|----------------------------------------------------------------------------|-------------------------------|---------------------------------|---------------------------------------------------------------------|-----------------------------------------------------------------------------------|
|           |               |              |                                                                                            |                    |                                                             |                                          |                                                                                                                                                                                           |                                                                                               | Numerically better outcome in experimental arm but not significant P value | Emphasis on subgroup analysis | Emphasis on secondary endpoints | Interpretation as "non inferiority" of a superiority negative trial |                                                                                   |
| ASCO 2019 | 4507          | Zaghloul     | Locally advanced bladder cancer after radical cystectomy; adjuvant treatment               | 123                | Adjuvant chemotherapy + radiotherapy; Adjuvant chemotherapy | Adjuvant radiotherapy;                   | Adjuvant radiotherapy a good option for patients with locally advanced bladder cancer where an alternative to chemo is desired by the patient and/or physician                            | Not clear (only comparison of radiotherapy vs chemotherapy is presented, no clear hypothesis) |                                                                            |                               |                                 | Yes                                                                 |                                                                                   |
| ASCO 2019 | 1003          | Schmid       | Untreated locally advanced or metastatic triple-negative breast cancer; first line therapy | 902                | Atezolizumab + nab-paclitaxel                               | Placebo + nab-paclitaxel                 | Although not formally testable due to prespecified statistical analysis plan, a median OS improvement from 18 to 25 months was observed in the PDL1+ population                           | No                                                                                            | Yes                                                                        |                               |                                 |                                                                     | *Statistical test of OS in PDL1+ patients, not allowed due to hierarchical design |
| ASCO 2019 | 504           | Del Mastro   | Breast cancer; adjuvant treatment after 2-3 years of tamoxifen                             | 2056               | Letrozole, 5 years                                          | Letrozole, 2-3 years                     | These findings are consistent with the results of previous studies and suggest that [...] extended treatment could be considered in breast cancer patients at residual risk of recurrence | No                                                                                            | Yes                                                                        |                               |                                 |                                                                     |                                                                                   |
| ASCO 2019 | 6002          | Guigay       | Recurrent/metastatic head and neck squamous cell carcinoma; first line therapy             | 539                | Cisplatin + 5-fluorouracil + cetuximab (EXTREME)            | Cisplatin + docetaxel + cetuximab (TPEX) | Despite the lack of significant OS increase, TPEX could favourably replace EXTREME as a new option for first-line treatment                                                               | Yes                                                                                           |                                                                            |                               |                                 | Yes                                                                 |                                                                                   |
| ASCO 2019 | 8501          | Kenmotsu     | Resected stage II-IIIa non-squamous NSCLC; adjuvant treatment                              | 804                | Pemetrexed + cisplatin                                      | Vinorelbine + cisplatin                  | These data suggest that pemetrexed + cisplatin can be an option for adjuvant chemotherapy, especially for EGFR wild-type non-squamous NSCLC                                               | Yes                                                                                           |                                                                            | Yes                           | Yes                             | Yes                                                                 |                                                                                   |

| Meeting   | Abstract code | First author | Disease and setting                                                              | Number of patients | Experimental treatment                                                 | Standard treatment                | Authors' conclusions                                                                                                                                                                                                                                                  | Statement in Conclusions that primary endpoint was not met | Reason of not-negative authors' conclusions                                |                               |                                 |                                                                     | Notes                                                                                                      |
|-----------|---------------|--------------|----------------------------------------------------------------------------------|--------------------|------------------------------------------------------------------------|-----------------------------------|-----------------------------------------------------------------------------------------------------------------------------------------------------------------------------------------------------------------------------------------------------------------------|------------------------------------------------------------|----------------------------------------------------------------------------|-------------------------------|---------------------------------|---------------------------------------------------------------------|------------------------------------------------------------------------------------------------------------|
|           |               |              |                                                                                  |                    |                                                                        |                                   |                                                                                                                                                                                                                                                                       |                                                            | Numerically better outcome in experimental arm but not significant P value | Emphasis on subgroup analysis | Emphasis on secondary endpoints | Interpretation as "non inferiority" of a superiority negative trial |                                                                                                            |
| ASCO 2019 | 9504          | Tarhini      | Resected high- risk melanoma; adjuvant treatment                                 | 1670               | Ipilimumab 3 mg/kg; Ipilimumab 10 mg/kg                                | High-dose interferon              | The data support the use of ipilimumab 3mg/kg over high-dose interferon, based on improved survival and similar RFS, and comparable toxicity                                                                                                                          | No                                                         | Yes                                                                        |                               |                                 |                                                                     |                                                                                                            |
| ASCO 2019 | LBA 4007      | Tabernero    | Advanced gastric or gastroesophageal junction adenocarcinoma, first line therapy | 763                | Pembrolizumab alone; Pembrolizumab plus chemotherapy                   | Chemotherapy                      | Favorable effect on overall survival of pembrolizumab vs chemotherapy in patients with CPS $\geq$ 10*. Modest additional benefit of pembrolizumab plus chemotherapy vs chemotherapy with manageable safety profile                                                    | No                                                         | Yes                                                                        |                               |                                 |                                                                     | *Statistical test of pembrolizumab vs chemotherapy in CPS $\geq$ 10 not allowed due to hierarchical design |
| ASCO 2019 | 4004          | Finn         | Advanced HCC -second line therapy                                                | 413                | Pembrolizumab                                                          | Placebo                           | Taken together, these data support that the risk-benefit balance for pembrolizumab is favourable in the second-line setting for HCC                                                                                                                                   | Yes                                                        | Yes                                                                        |                               | Yes                             |                                                                     |                                                                                                            |
| ASCO 2019 | 4002          | Izumi        | Small HCC, early stage                                                           | 293                | Surgery                                                                | Radiofrequency ablation           | Surgery and RFA were both safe therapeutic approaches. Both of them provided similar RFS for early stage HCC smaller than 3 cm                                                                                                                                        | No                                                         |                                                                            |                               |                                 | Yes                                                                 |                                                                                                            |
| ASCO 2019 | 4000          | Tempero      | Resectate pancreatic adenocarcinoma- adjuvant setting                            | 866                | Nab-paclitaxel + gemcitabine                                           | Gemcitabine                       | Final OS will clarify the role for adjuvant nab-paclitaxel + gemcitabine in resected pancreatic cancer. Continued investigation of the regimen (eg in patients with positive lymphnodes or R1 resections as well as those non candidates for FOLFIRINOX) is warranted | Yes                                                        |                                                                            | Yes                           | Yes                             |                                                                     | Emphasis on sensitivity analyses.                                                                          |
| ASCO 2019 | 3504          | Seymour      | Colon cancer, neoadjuvant treatment                                              | 1052               | Neoadjuvant chemotherapy followed by surgery and adjuvant chemotherapy | Surgery and adjuvant chemotherapy | Neoadjuvant chemotherapy for colon cancer improves surgical outcomes and can now be considered as a treatment option                                                                                                                                                  | Yes                                                        | Yes                                                                        |                               | Yes                             |                                                                     |                                                                                                            |

| Meeting   | Abstract code | First author | Disease and setting                                                              | Number of patients | Experimental treatment                                                 | Standard treatment                | Authors' conclusions                                                                                    | Statement in Conclusions that primary endpoint was not met | Reason of not-negative authors' conclusions                                |                               |                                 |                                                                     | Notes |
|-----------|---------------|--------------|----------------------------------------------------------------------------------|--------------------|------------------------------------------------------------------------|-----------------------------------|---------------------------------------------------------------------------------------------------------|------------------------------------------------------------|----------------------------------------------------------------------------|-------------------------------|---------------------------------|---------------------------------------------------------------------|-------|
|           |               |              |                                                                                  |                    |                                                                        |                                   |                                                                                                         |                                                            | Numerically better outcome in experimental arm but not significant P value | Emphasis on subgroup analysis | Emphasis on secondary endpoints | Interpretation as "non inferiority" of a superiority negative trial |       |
| ESMO 2019 | 52300         | Morton       | Colon cancer, neoadjuvant treatment                                              | 1052               | Neoadjuvant chemotherapy followed by surgery and adjuvant chemotherapy | Surgery and adjuvant chemotherapy | Trend towards improved survival. Neoadjuvant chemotherapy can be considered a new therapeutic option    | Yes                                                        | Yes                                                                        |                               | Yes                             |                                                                     |       |
| ESMO 2019 | LBA43         | Kang         | Advanced / metastatic gastric cancer, who failed 2 or more lines of chemotherapy | 460                | Rivoceranib plus best supportive care                                  | Placebo plus best supportive care | These findings suggest that rivoceranib has a benefit with a favorable safety profile in gastric cancer | Yes                                                        |                                                                            | Yes                           | Yes                             |                                                                     |       |
| ESMO 2019 | LBA21         | Cortes       | Metastatic, pretreated triple-negative breast cancer                             | 622                | Pembrolizumab                                                          | Single-agent chemotherapy         | Pembrolizumab showed a clear trend in improved efficacy with PD-L1 enrichment                           | Yes                                                        |                                                                            | Yes                           | Yes                             |                                                                     |       |

ASCO: American Society of Clinical Oncology; ESMO: European Society for Medical Oncology; HCC: hepatocellular carcinoma; OS: overall survival; RPF: recurrence-free survival; RFA: radiofrequency ablation; CPS: combined positive score; NSCLC: non-small cell lung cancer; EGFR: Epidermal Growth Factor Receptor; FFS: failure-free survival; GIST: gastrointestinal stromal tumors.
